# Supplementary material for: Is the Rivermead Post-Concussion Symptoms Questionnaire a Reliable and Valid Measure to Assess Long-Term Symptoms in Traumatic Brain Injury and Orthopedic Injury Patients? A Novel Investigation Using Rasch Analysis
Source: PubMed Central journal article supplement (PMC8240882; doi:10.1089/neur.2020.0017), 2020-08-11

## Supplementary Data

**Supplementary Table S1. Ordinal to Interval Conversions for Total RPQ Scores**

| Ordinal<br>Total score | Interval |       | Ordinal<br>Total score | Interval |       |
|------------------------|----------|-------|------------------------|----------|-------|
|                        | Logits   | Scale |                        | Logits   | Scale |
| 0                      | -5.35    | 0.00  | 33                     | 0.37     | 39.68 |
| 1                      | -4.48    | 6.08  | 34                     | 0.43     | 40.11 |
| 2                      | -3.86    | 10.40 | 35                     | 0.49     | 40.53 |
| 3                      | -3.41    | 13.46 | 36                     | 0.55     | 40.95 |
| 4                      | -3.07    | 15.88 | 37                     | 0.61     | 41.36 |
| 5                      | -2.77    | 17.90 | 38                     | 0.67     | 41.77 |
| 6                      | -2.52    | 19.65 | 39                     | 0.72     | 42.16 |
| 7                      | -2.30    | 21.19 | 40                     | 0.78     | 42.56 |
| 8                      | -2.10    | 22.57 | 41                     | 0.84     | 42.95 |
| 9                      | -1.92    | 23.82 | 42                     | 0.89     | 43.33 |
| 10                     | -1.75    | 24.97 | 43                     | 0.95     | 43.71 |
| 11                     | -1.60    | 26.04 | 44                     | 1.00     | 44.08 |
| 12                     | -1.46    | 27.03 | 45                     | 1.06     | 44.46 |
| 13                     | -1.33    | 27.95 | 46                     | 1.11     | 44.83 |
| 14                     | -1.20    | 28.81 | 47                     | 1.16     | 45.19 |
| 15                     | -1.08    | 29.62 | 48                     | 1.21     | 45.55 |
| 16                     | -0.97    | 30.38 | 49                     | 1.27     | 45.92 |
| 17                     | -0.87    | 31.11 | 50                     | 1.32     | 46.30 |
| 18                     | -0.77    | 31.80 | 51                     | 1.38     | 46.69 |
| 19                     | -0.68    | 32.45 | 52                     | 1.43     | 47.07 |
| 20                     | -0.59    | 33.08 | 53                     | 1.49     | 47.49 |
| 21                     | -0.50    | 33.69 | 54                     | 1.56     | 47.93 |
| 22                     | -0.42    | 34.26 | 55                     | 1.62     | 48.41 |
| 23                     | -0.33    | 34.82 | 56                     | 1.70     | 48.93 |
| 24                     | -0.26    | 35.36 | 57                     | 1.79     | 49.52 |
| 25                     | -0.18    | 35.89 | 58                     | 1.88     | 50.21 |
| 26                     | -0.11    | 36.40 | 59                     | 2.00     | 51.03 |
| 27                     | -0.03    | 36.91 | 60                     | 2.15     | 52.05 |
| 28                     | 0.04     | 37.40 | 61                     | 2.35     | 53.41 |
| 29                     | 0.11     | 37.87 | 62                     | 2.63     | 55.38 |
| 30                     | 0.17     | 38.34 | 63                     | 3.10     | 58.64 |
| 31                     | 0.24     | 38.79 | 64                     | 3.87     | 64.00 |
| 32                     | 0.30     | 39.24 |                        |          |       |

RPQ, Rivermead Post-Concussion Symptoms Questionnaire.

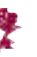

Supplement: Supp_TableS1.pdf [file Supp_TableS1.pdf]
